# Supplementary material
Source: Springer Nature journal article supplement (https://www.springermedizin.de/resource/supplementary/12885_2013_4337_MOESM1_ESM.pdf/9466880)
Supplement: MOESM1 [file 9466880]

Supplemental Table 1: List of proteins exclusively identified in MCF-Exo.

**FINC\_HUMAN** Mass: 262622 **Score: 335** Matches: 9(8) Sequences: 9(8) emPAI: 0.13  
Fibronectin OS=Homo sapiens GN=FN1 PE=1 SV=4

| Query | Score | Peptide             |
|-------|-------|---------------------|
| 628   | 37    | R.FTNIGPDTMR.V      |
| 803   | 79    | R.DLQFVEVTDVK.V     |
| 883   | 76    | K.IYLYTLNDNAR.S     |
| 884   | 57    | K.IAWESPQGQVSR.Y    |
| 898   | 86    | K.GLAFTDVDVDSIK.I   |
| 929   | 96    | R.VPGTSTSATLTGLTR.G |
| 1007  | 71    | R.SYTITGLQPGTDYK.I  |
| 1039  | 68    | R.GDSPASSKPISINYR.T |
| 1070  | 57    | R.VDVIPVNLPGEHGQR.L |

**ANXA1\_HUMAN** Mass: 38714 **Score: 322** Matches: 7(7) Sequences: 7(7) emPAI: 1.08  
Annexin A1 OS=Homo sapiens GN=ANXA1 PE=1 SV=2

| Query | Score | Peptide                     |
|-------|-------|-----------------------------|
| 554   | 55    | R.SEIDMNDIK.A               |
| 709   | 75    | K.DITSDTSGDFR.N             |
| 777   | 81    | K.TPAQFDADEL.R.A            |
| 1028  | 82    | K.GTDVNVFNTILTTR.S          |
| 1166  | 131   | R.SEDFGVNEDLADSDAR.A        |
| 1330  | 50    | K.AAYLQETGKPLDETLKK.A       |
| 1540  | 66    | K.GPGSAVSPYPTFNPSSDVAALHK.A |

**VIME\_HUMAN** Mass: 53651 **Score: 205** Matches: 7(6) Sequences: 7(6) emPAI: 0.58  
Vimentin OS=Homo sapiens GN=VIM PE=1 SV=4

| Query | Score | Peptide            |
|-------|-------|--------------------|
| 561   | 37    | R.DNLAEDIMR.L      |
| 574   | 73    | K.FADLSEAANR.N     |
| 588   | 50    | K.VELQELNDR.F      |
| 598   | 52    | R.EYQDLLNVK.M      |
| 844   | 65    | R.EEAENTLQSFR.Q    |
| 1036  | 63    | R.TNEKVELQELNDR.F  |
| 1159  | 93    | R.LQDEIQNMKEEMAR.H |

**ACTA\_HUMAN** Mass: 42009 **Score: 200** Matches: 11(10) Sequences: 5(4) emPAI: 0.97  
Actin, aortic smooth muscle OS=Homo sapiens GN=ACTA2 PE=1 SV=1

| Query | Score | Peptide                         |
|-------|-------|---------------------------------|
| 488   | 55    | R.DLTDYLMK.I                    |
| 508   | -46   | R.DLTDYLMK.I + Oxidation (M)    |
| 647   | -48   | K.EITALAPSTMK.I                 |
| 648   | 67    | K.EITALAPSTMK.I                 |
| 667   | -39   | K.EITALAPSTMK.I + Oxidation (M) |
| 668   | -53   | K.EITALAPSTMK.I + Oxidation (M) |
| 670   | -49   | K.EITALAPSTMK.I + Oxidation (M) |
| 688   | 37    | R.AVFPSIVGRPR.H                 |
| 1218  | -58   | K.SYELPDGQVITIGNER.F            |
| 1219  | 61    | K.SYELPDGQVITIGNER.F            |
| 1380  | 60    | K.YPIEHGIITNWDDMEK.I            |

**5NTD\_HUMAN** Mass: 63367 **Score: 158** Matches: 5(4) Sequences: 4(3) emPAI: 0.38  
5'-nucleotidase OS=Homo sapiens GN=NT5E PE=1 SV=1

| Query | Score | Peptide               |
|-------|-------|-----------------------|
| 781   | 69    | K.YPFIVTSDDGR.K       |
| 825   | 36    | R.KVPVVQAYAFGK.Y      |
| 1152  | 40    | K.VLPVGDEVVGIVGYTSK.E |
| 1308  | 103   | R.HDSGDQDINVVSTYISK.M |
| 1313  | -47   | R.HDSGDQDINVVSTYISK.M |

**1C07\_HUMAN** Mass: 40648 **Score: 137** Matches: 4(3) Sequences: 4(3) emPAI: 0.49  
HLA class I histocompatibility antigen, Cw-7 alpha chain OS=Homo sapiens GN=HLA-C PE=1 SV=3

| Query | Score | Peptide                       |
|-------|-------|-------------------------------|
| 879   | 38    | R.YLENGKETLQR.A               |
| 921   | 60    | K.WAAVVVPSGQEQR.Y             |
| 977   | 66    | R.SWTAADTAAQITQR.K            |
| 1580  | 80    | R.DGEDQTQDTELVETRPAGDGTFFQK.W |

**GRP78\_HUMAN** Mass: 72332 **Score: 108** Matches: 5(3) Sequences: 4(3) emPAI: 0.18  
78 kDa glucose-regulated protein OS=Homo sapiens GN=HSPA5 PE=1 SV=2

| Query | Score | Peptide            |
|-------|-------|--------------------|
| 729   | -38   | R.VEIIANDQGNR.I    |
| 730   | 46    | R.VEIIANDQGNR.I    |
| 839   | 38    | R.NELESYAYSLK.N    |
| 922   | 53    | R.TWNDPSVQQDIK.F   |
| 1094  | 84    | K.NQLTSNPENTVFDK.R |

**H2B1C\_HUMAN** Mass: 13906 **Score: 106** Matches: 2(2) Sequences: 2(2) emPAI: 0.76  
Histone H2B type 1-C/E/F/G/I OS=Homo sapiens GN=HIST1H2BC PE=1 SV=4

| Query | Score | Peptide                               |
|-------|-------|---------------------------------------|
| 780   | 39    | R.KESYSVYVYK.V                        |
| 1208  | 104   | K.AMGIMNSFVNDIFER.I + 2 Oxidation (M) |

**CD44\_HUMAN** Mass: 81537 **Score: 99** Matches: 2(2) Sequences: 2(2) emPAI: 0.11  
CD44 antigen OS=Homo sapiens GN=CD44 PE=1 SV=3

| Query | Score | Peptide             |
|-------|-------|---------------------|
| 875   | 60    | K.LVINSNGNGAVEDR.K  |
| 1271  | 77    | K.ESSETPDQFMTAETR.N |

**MFGM\_HUMAN** Mass: 43122 **Score: 91** Matches: 1(1) Sequences: 1(1) emPAI: 0.10  
Lactadherin OS=Homo sapiens GN=MFG8 PE=1 SV=2

| Query | Score | Peptide         |
|-------|-------|-----------------|
| 619   | 91    | K.EVTGIITQGAR.N |

**LDHA\_HUMAN** Mass: 36688 **Score: 81** Matches: 3(3) Sequences: 3(3) emPAI: 0.39  
L-lactate dehydrogenase A chain OS=Homo sapiens GN=LDHA PE=1 SV=2

| Query | Score | Peptide        |
|-------|-------|----------------|
| 591   | 53    | K.SADTLWGIQK.E |

609 44 K.VTLTSEEEAR.L  
778 55 K.QVVESAYEVIK.L

**K22E\_HUMAN** Mass: 65432 **Score: 78** Matches: 1(1) Sequences: 1(1) emPAI: 0.06  
Keratin, type II cytoskeletal 2 epidermal OS=Homo sapiens GN=KRT2 PE=1 SV=2

Query Score Peptide  
934 78 R.FLEQQNQVLQTK.W

**EDIL3\_HUMAN** Mass: 53764 **Score: 77** Matches: 2(1) Sequences: 2(1) emPAI: 0.08  
EGF-like repeat and discoidin I-like domain-containing protein 3 OS=Homo sapiens GN=EDIL3 PE=1 SV=1

Query Score Peptide  
645 36 K.NVIDPPIYAR.H  
1383 77 R.GNIDNNTPYANSFTPIK.A

**PGK1\_HUMAN** Mass: 44614 **Score: 69** Matches: 2(2) Sequences: 2(2) emPAI: 0.20  
Phosphoglycerate kinase 1 OS=Homo sapiens GN=PGK1 PE=1 SV=3

Query Score Peptide  
577 53 K.VLPGVDALSNI.-  
892 49 R.AHSSMVGVNLPQK.A

**CH10\_HUMAN** Mass: 10932 **Score: 67** Matches: 1(1) Sequences: 1(1) emPAI: 0.43  
10 kDa heat shock protein, mitochondrial OS=Homo sapiens GN=HSPE1 PE=1 SV=2

Query Score Peptide  
836 67 K.VLQATVVAVGSGSK.G

**MYOF\_HUMAN** Mass: 234706 **Score: 65** Matches: 1(1) Sequences: 1(1) emPAI: 0.02  
Myoferlin OS=Homo sapiens GN=MYOF PE=1 SV=1

Query Score Peptide  
798 65 K.GPVGTVSEAQLAR.R

**GTR1\_HUMAN** Mass: 54083 **Score: 61** Matches: 1(1) Sequences: 1(1) emPAI: 0.08  
Solute carrier family 2, facilitated glucose transporter member 1 OS=Homo sapiens GN=SLC2A1 PE=1 SV=2

Query Score Peptide  
617 61 R.TFDEIASGFR.Q

**BASI\_HUMAN** Mass: 42200 **Score: 59** Matches: 2(2) Sequences: 2(2) emPAI: 0.21  
Basigin OS=Homo sapiens GN=BSG PE=1 SV=2

Query Score Peptide  
510 39 R.FFVSSSQGR.S  
915 54 K.GGVVLKEDALPGQK.T

**MYH9\_HUMAN** Mass: 226530 **Score: 58** Matches: 1(1) Sequences: 1(1) emPAI: 0.02  
Myosin-9 OS=Homo sapiens GN=MYH9 PE=1 SV=4

Query Score Peptide

683 58 K.ALELDSNLYR.I

**COF1\_HUMAN** Mass: 18502 **Score: 57** Matches: 1(1) Sequences: 1(1) emPAI: 0.24

Cofilin-1 OS=Homo sapiens GN=CFL1 PE=1 SV=3

| Query | Score | Peptide         |
|-------|-------|-----------------|
| 869   | 57    | R.YALYDATYETK.E |

**HMGA1\_HUMAN** Mass: 11676 **Score: 57** Matches: 3(2) Sequences: 2(2) emPAI: 1.72

High mobility group protein HMG-I/HMG-Y OS=Homo sapiens GN=HMGA1 PE=1 SV=3

| Query | Score | Peptide                   |
|-------|-------|---------------------------|
| 1040  | 47    | R.KQPPVSPGTALVGSQK.E      |
| 1511  | -36   | K.KLEKEEEEEEGISQESSEEEQ.- |
| 1512  | 42    | K.KLEKEEEEEEGISQESSEEEQ.- |

**PPIA\_HUMAN** Mass: 18012 **Score: 56** Matches: 1(1) Sequences: 1(1) emPAI: 0.25

Peptidyl-prolyl cis-trans isomerase A OS=Homo sapiens GN=PPIA PE=1 SV=2

| Query | Score | Peptide       |
|-------|-------|---------------|
| 638   | 56    | K.FEDENFILK.H |

**MYL6B\_HUMAN** Mass: 22764 **Score: 56** Matches: 1(1) Sequences: 1(1) emPAI: 0.19

Myosin light chain 6B OS=Homo sapiens GN=MYL6B PE=1 SV=1

| Query | Score | Peptide           |
|-------|-------|-------------------|
| 882   | 56    | R.ALGQNPTNAEVLK.V |

**S10AA\_HUMAN** Mass: 11203 **Score: 50** Matches: 1(1) Sequences: 1(1) emPAI: 0.41

Protein S100-A10 OS=Homo sapiens GN=S100A10 PE=1 SV=2

| Query | Score | Peptide               |
|-------|-------|-----------------------|
| 1357  | 50    | K.EFPGFLENQKDPLAVDK.I |

**PLP2\_HUMAN** Mass: 16691 **Score: 48** Matches: 1(1) Sequences: 1(1) emPAI: 0.27

Proteolipid protein 2 OS=Homo sapiens GN=PLP2 PE=1 SV=1

| Query | Score | Peptide           |
|-------|-------|-------------------|
| 763   | 48    | R.HTAAPTDPADGPV.- |

**THIO\_HUMAN** Mass: 11737 **Score: 47** Matches: 1(1) Sequences: 1(1) emPAI: 0.39

Thioredoxin OS=Homo sapiens GN=TXN PE=1 SV=3

| Query | Score | Peptide           |
|-------|-------|-------------------|
| 864   | 47    | K.TAFQEALDAAGDK.L |

**LMNA\_HUMAN** Mass: 74139 **Score: 43** Matches: 1(1) Sequences: 1(1) emPAI: 0.06

Prelamin-A/C OS=Homo sapiens GN=LMNA PE=1 SV=1

| Query | Score | Peptide         |
|-------|-------|-----------------|
| 651   | 43    | K.AAYEAELGDAR.K |

**RL7\_HUMAN** Mass: 29225 **Score: 41** Matches: 1(1) Sequences: 1(1) emPAI: 0.15

60S ribosomal protein L7 OS=Homo sapiens GN=RPL7 PE=1 SV=1

| Query | Score | Peptide         |
|-------|-------|-----------------|
| 659   | 41    | R.IALTDNALIAR.S |

**GNAO\_HUMAN** Mass: 40050 **Score: 41** Matches: 1(1) Sequences: 1(1) emPAI: 0.11

Guanine nucleotide-binding protein G(o) subunit alpha OS=Homo sapiens GN=GNAO1 PE=1 SV=4

| Query | Score | Peptide          |
|-------|-------|------------------|
| 900   | 41    | K.TTGIVETHFTFK.N |

**AHNK\_HUMAN** Mass: 629094 **Score: 41** Matches: 1(1) Sequences: 1(1) emPAI: 0.01

Neuroblast differentiation-associated protein AHNAK OS=Homo sapiens GN=AHNAK PE=1 SV=2

| Query | Score | Peptide          |
|-------|-------|------------------|
| 767   | 41    | K.GEGPEVDVNLPK.A |

**TCPH\_HUMAN** Mass: 59366 **Score: 39** Matches: 1(1) Sequences: 1(1) emPAI: 0.07

T-complex protein 1 subunit eta OS=Homo sapiens GN=CCT7 PE=1 SV=2

| Query | Score | Peptide          |
|-------|-------|------------------|
| 697   | 39    | K.ATISNDGATILK.L |

**TMSL3\_HUMAN** Mass: 5063 **Score: 39** Matches: 1(1) Sequences: 1(1) emPAI: 1.03

Thymosin beta-4-like protein 3 OS=Homo sapiens GN=TMSL3 PE=2 SV=1

| Query | Score | Peptide           |
|-------|-------|-------------------|
| 964   | 39    | K.NPLPSKETIEQEK.Q |
